# Supplementary material
Source: HighWire-hosted journal article supplement (https://jitc.bmj.com/content/10/7/e004892)

Fig. S7

A

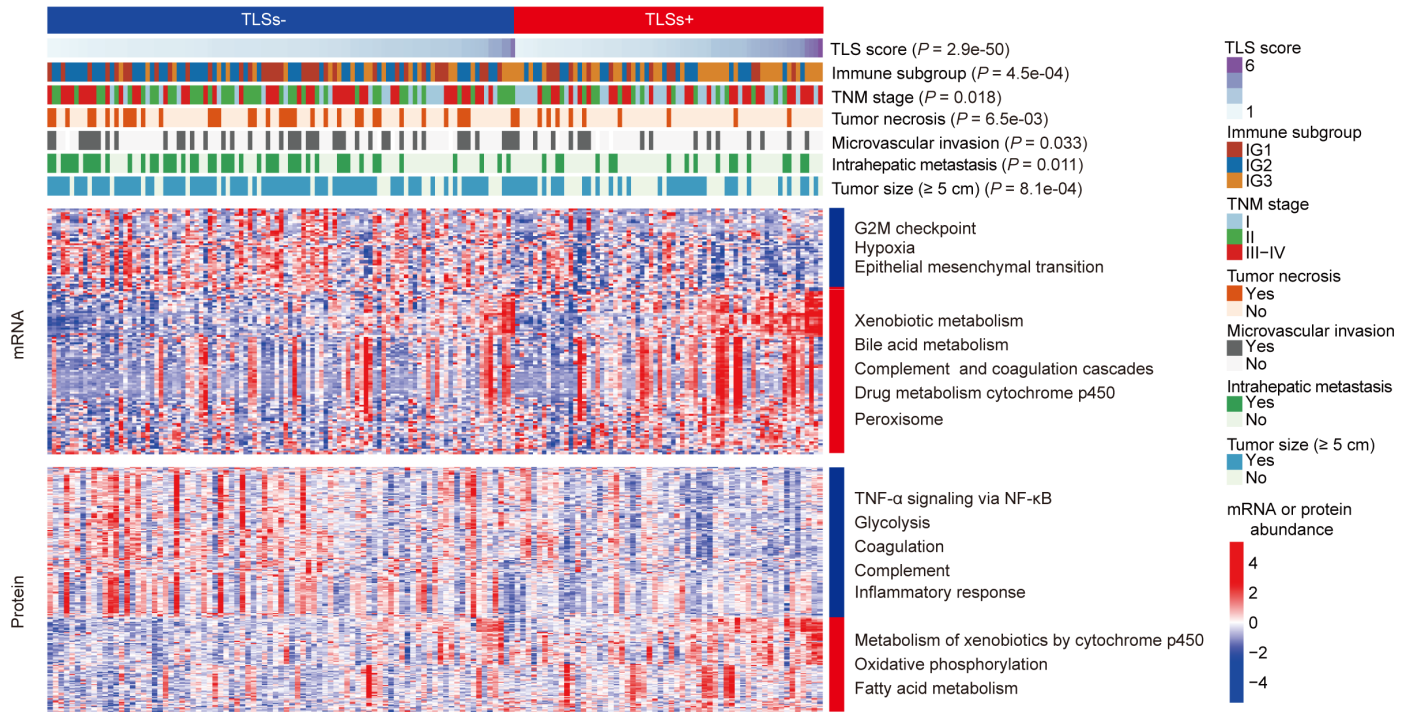

B

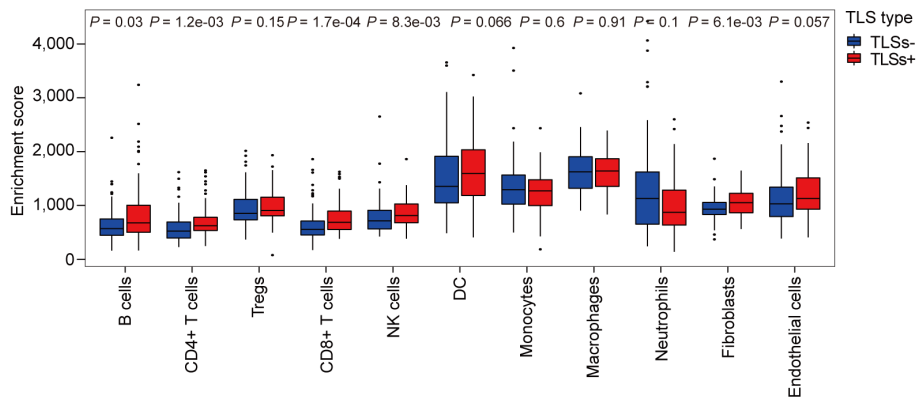

C

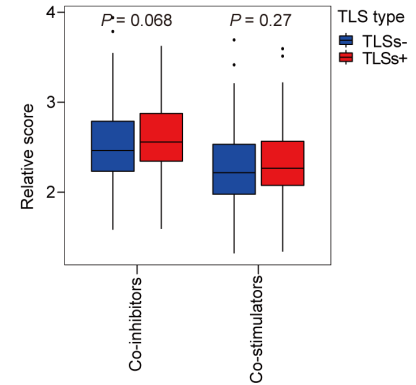

D

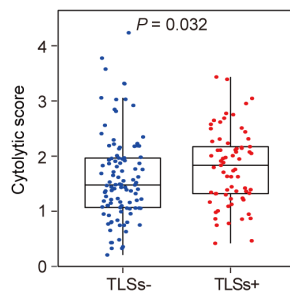

E

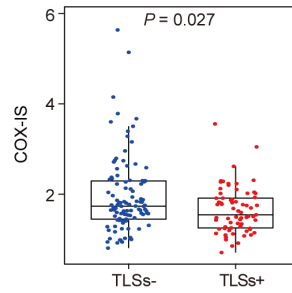

Supplement: inline-supplementary-material-13 [file inline-supplementary-material-13.pdf]

Fig. S1

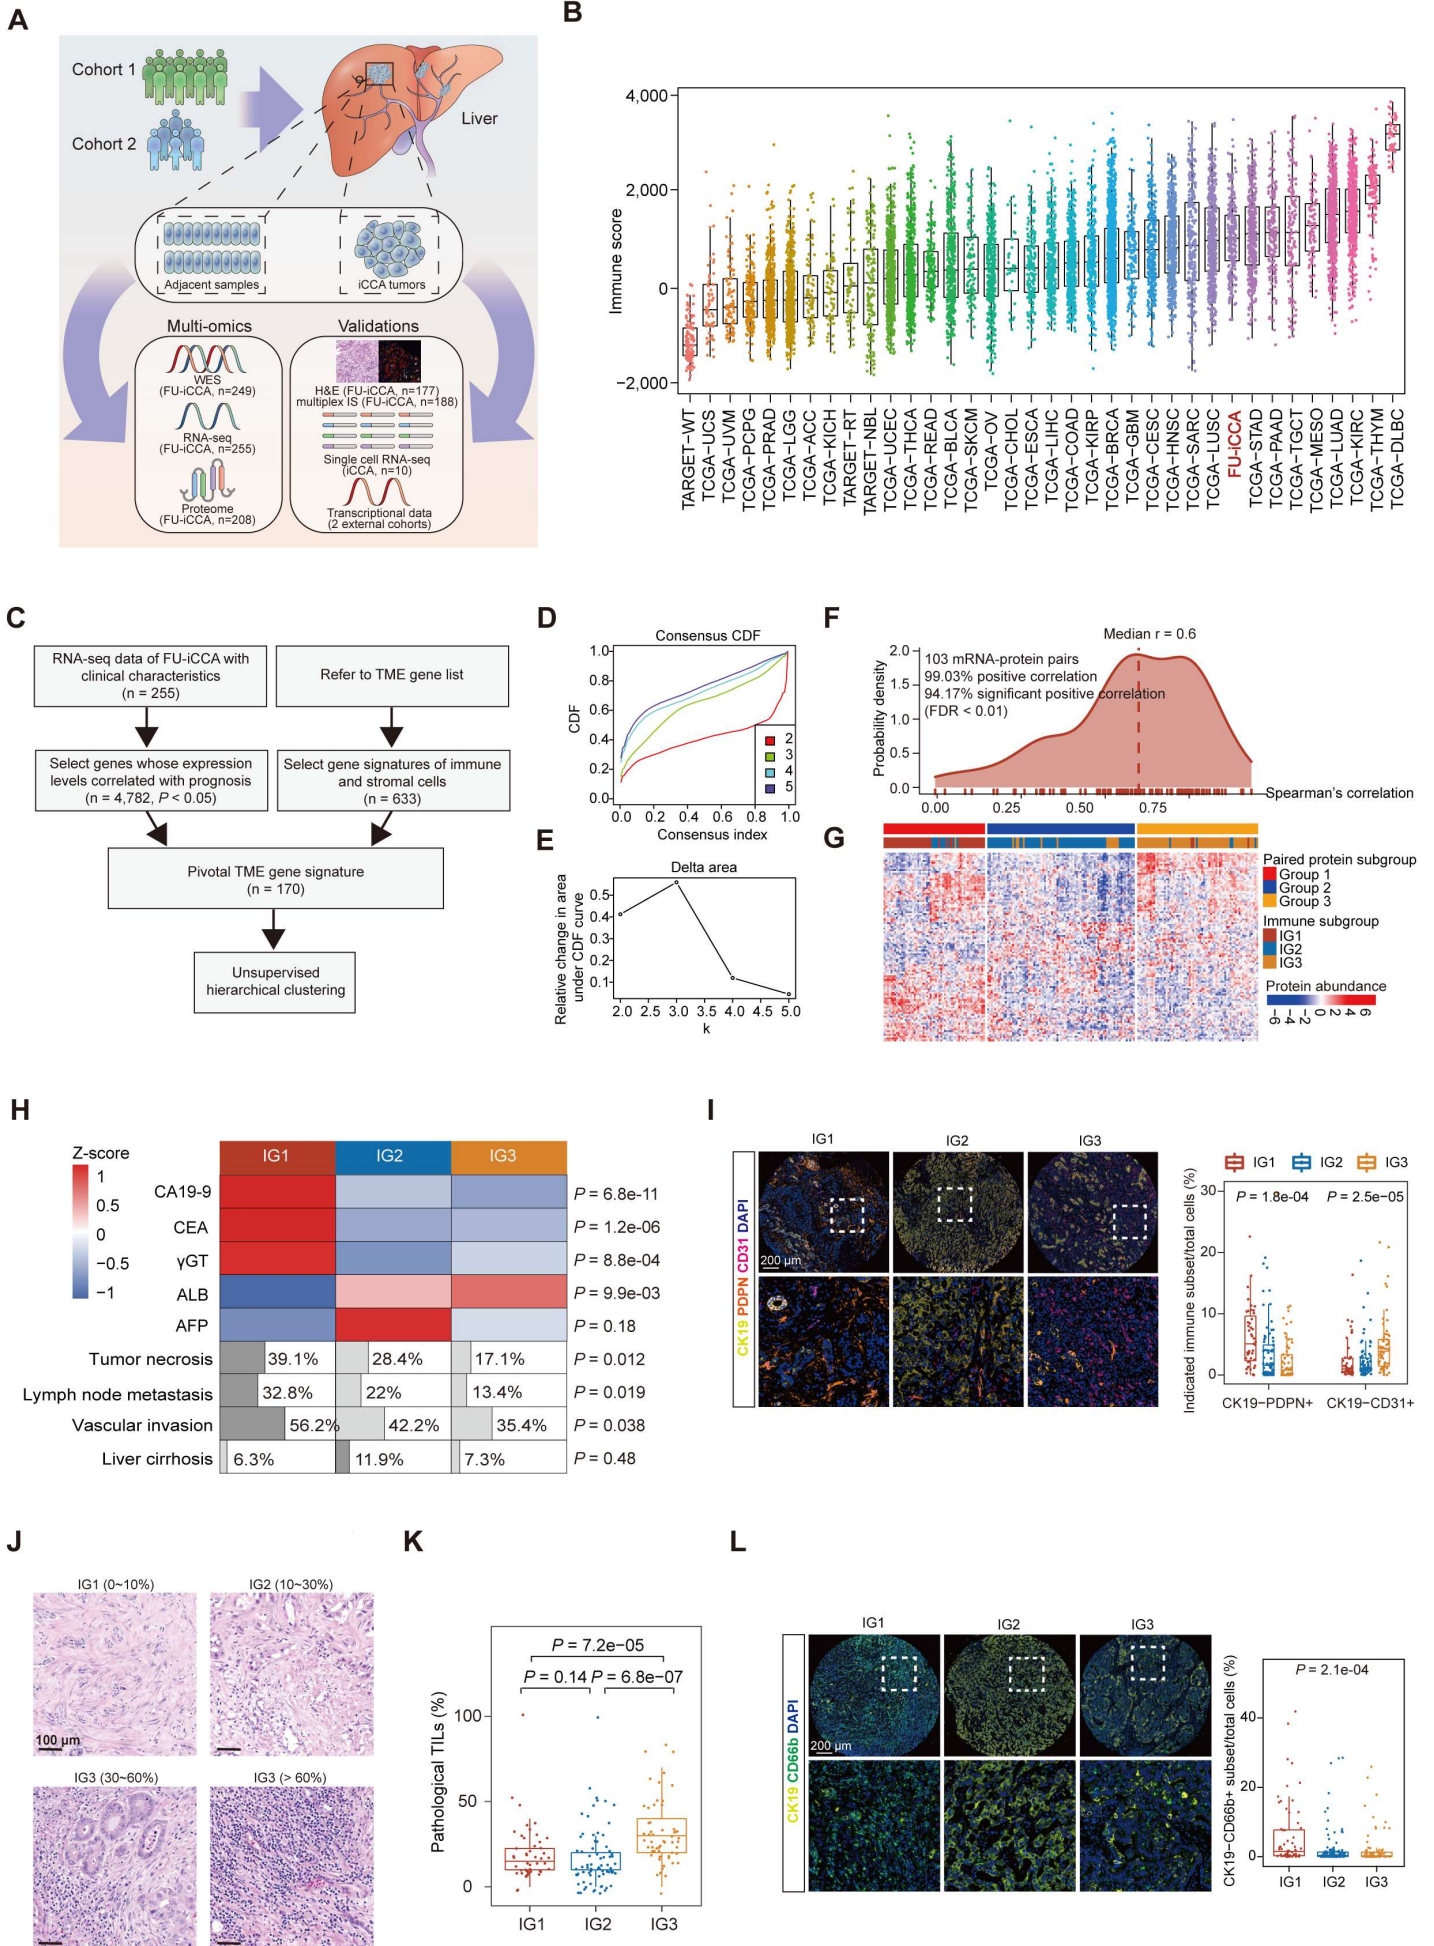

Supplement: inline-supplementary-material-3 [file inline-supplementary-material-3.pdf]

Fig. S4

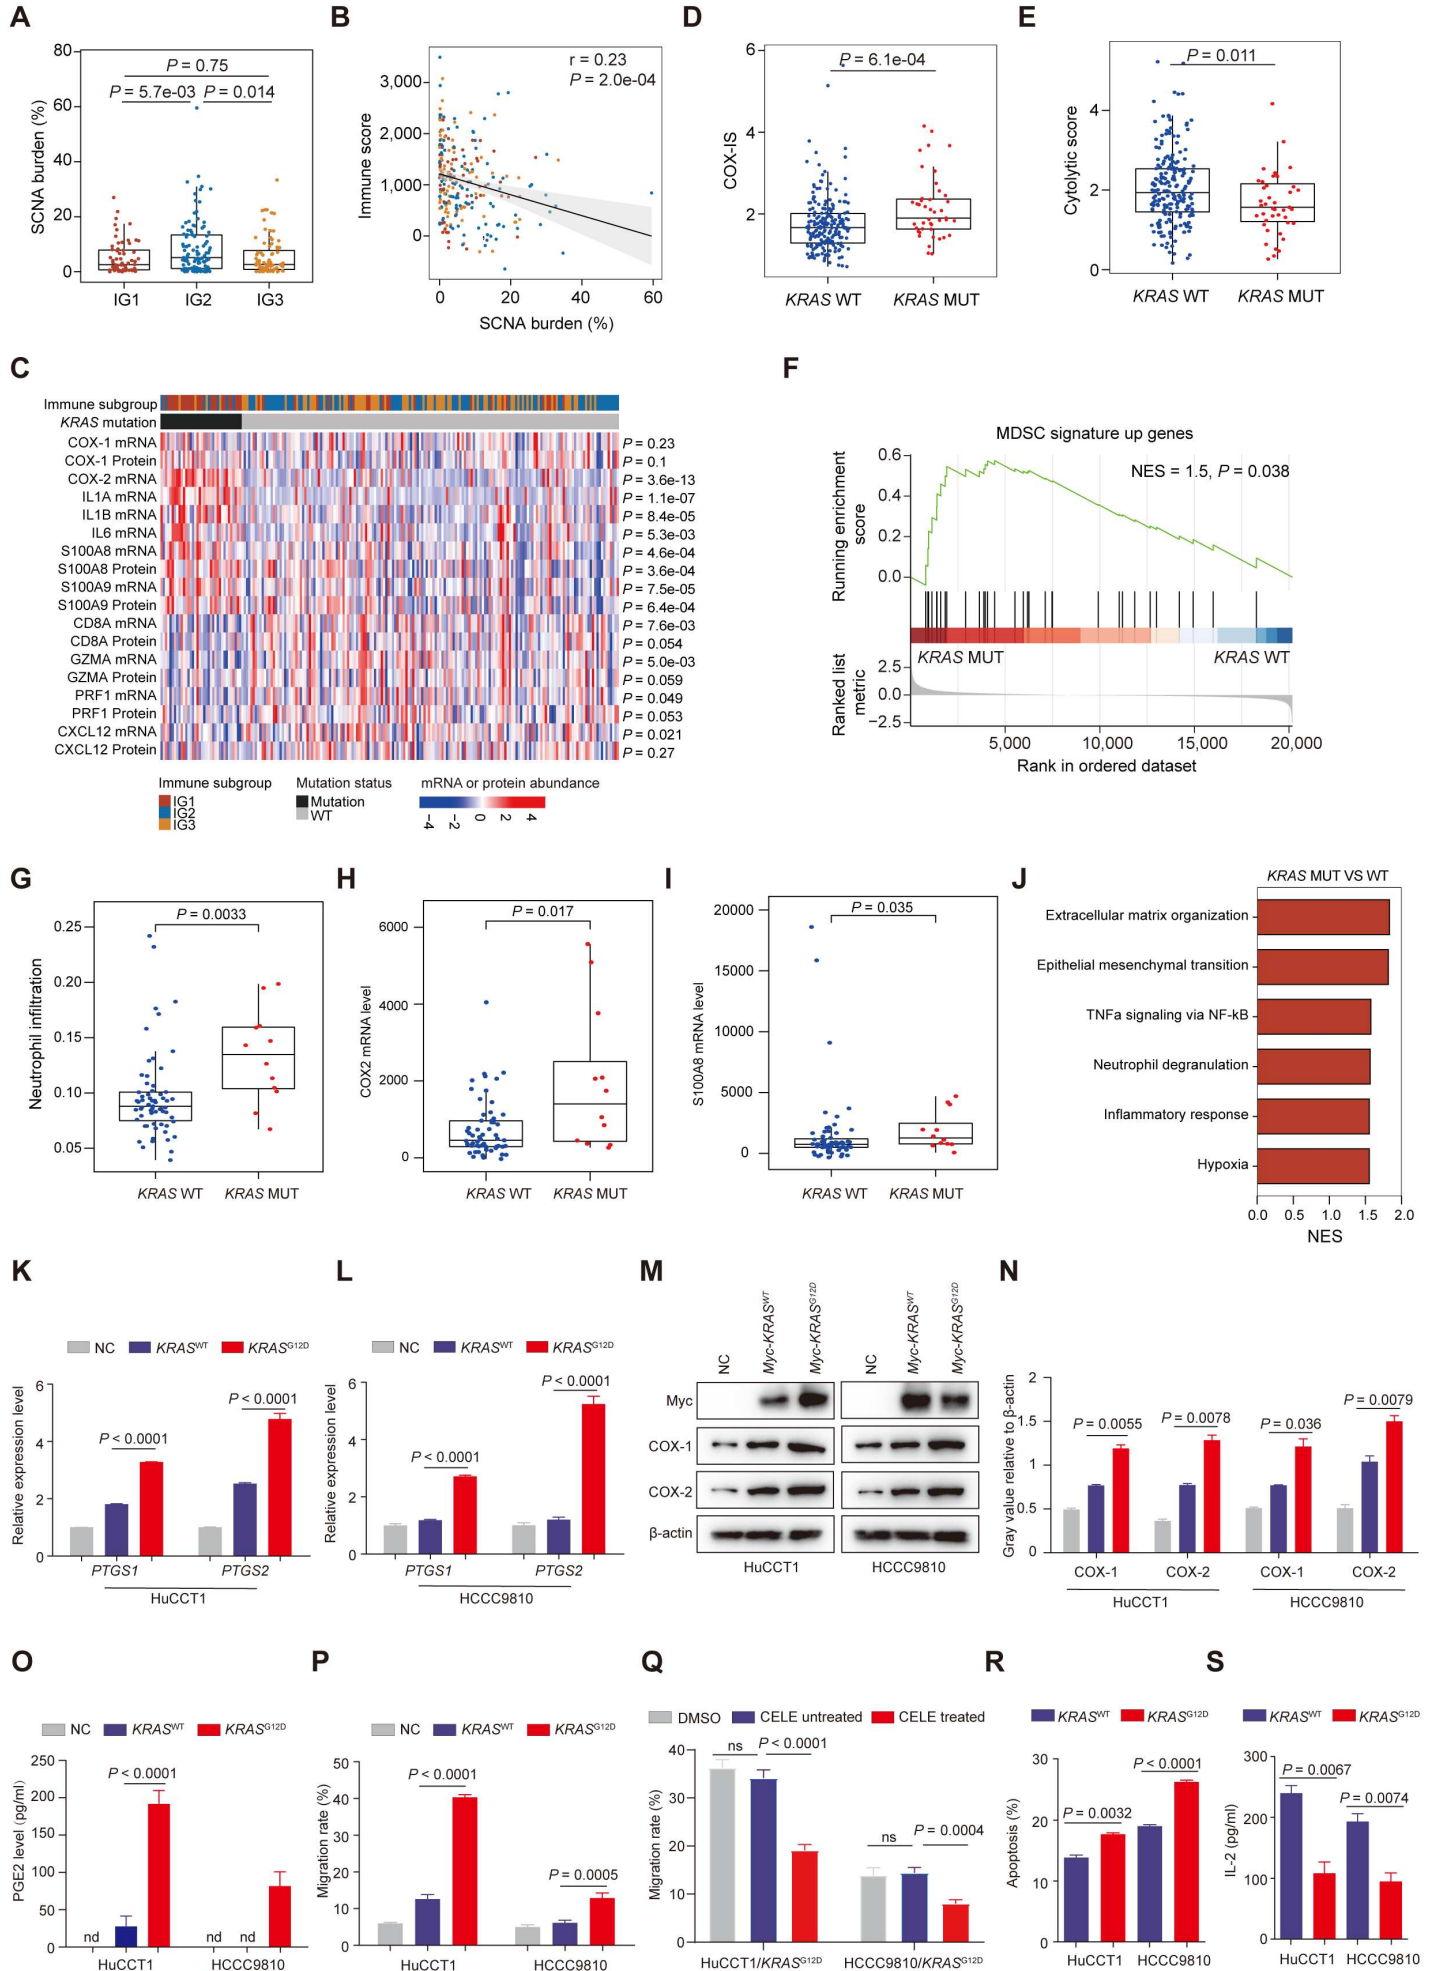

Supplement: inline-supplementary-material-7 [file inline-supplementary-material-7.pdf]
